# Supplementary material
Source: publisher figshare collection journal article supplement (https://frontiersin.figshare.com/ndownloader/files/35023231)
Supplement: Supplementary file [file 35023231]

We have uploaded the data to GenBank. The accession number is SCV001837654 ([https://submit.ncbi.nlm.nih.gov/subs/clinvar\\_wizard/SUB10342987/overview](https://submit.ncbi.nlm.nih.gov/subs/clinvar_wizard/SUB10342987/overview)). In addition, a screenshot of the data upload is listed below.

## Review & Submit

### Info

|                               |             |
|-------------------------------|-------------|
| Submission name .....         | SUB10342987 |
| Data from a named study ..... | no          |
| Release status .....          | public      |
| Accessions requested .....    | yes         |

### Organization(s)

|                                                       |                                            |
|-------------------------------------------------------|--------------------------------------------|
| Organization(s) .....                                 | Department of Traditional Chinese Medicine |
| From a single organization or multiple organizations? | single                                     |
| On behalf of another organization? .....              | no                                         |

### Variant

|                                             |                                                          |
|---------------------------------------------|----------------------------------------------------------|
| Type .....                                  | single                                                   |
| Method of description .....                 | hgvs                                                     |
| Assembly .....                              | GRCh38                                                   |
| Accession and version of reference sequence | NM_182943.3                                              |
| Description of the sequence change .....    | c.1856G>A                                                |
| Gene .....                                  | PLOD2: procollagen-lysine,2-oxoglutarate 5-dioxygenase 2 |
